# Supplementary material for: V4C3 MXene-derived Zn0.99V5O12·nH2O nanoribbons as advanced cathodes for ultra-long life aqueous zinc-ion batteries
Source: Royal Society of Chemistry journal article supplement (doi:10.1039/d3ta07589c), 2024-01-01
Supplement: d3ta07589c1.pdf [file d3ta07589c1.pdf]

## Supporting Information

### **V<sub>4</sub>C<sub>3</sub> MXene-derived Zn<sub>0.99</sub>V<sub>5</sub>O<sub>12</sub>·nH<sub>2</sub>O nanoribbons as advanced cathodes for ultra-long life aqueous zinc-ion batteries**

Wenhai Xiao,<sup>a</sup> Shenghong Yang,<sup>a</sup> Rui Jiang,<sup>a</sup> Qiaofeng Huang,<sup>a</sup> Xiaoyan Shi,<sup>a</sup> Yuen Hong Tsang,<sup>b</sup> Lianyi Shao\*<sup>a</sup> and Zhipeng Sun\*<sup>a</sup>

<sup>a</sup>School of Materials and Energy, Guangdong University of Technology, Guangzhou 510006, Guangdong, China. E-mail: shaolianyi@gdut.edu.cn, zpsunxj@gdut.edu.cn

<sup>b</sup>Department of Applied Physics and Materials Research Center, The Hong Kong Polytechnic University, Hung Hom, Kowloon, Hong Kong, China.

## Experimental Section

### Material characterization

X-ray diffraction (XRD) patterns were collected by Rigaku SmartLab diffractometer with Cu K $\alpha$  radiation. Raman patterns were collected by LabRAM HR Evolution. The microstructure morphologies of the as-synthesized products were performed by field emission scanning electron microscope (SEM, JEOL-6300F/Apreo 2S HiVac) and transmission electron microscope (TEM, Spectra 300, Thermo Fisher Scientific). The content of Zn<sup>2+</sup>/Co<sup>2+</sup>/Ni<sup>2+</sup> was determined quantitatively by inductively coupled plasma mass spectrometry (ICP-MS, ICAP RQ, Thermo Fisher). The elemental distribution was obtained by energy dispersive spectroscopy (EDS, XFlash<sup>®</sup>6|60). Thermogravimetric analysis (TGA) was conducted by TGA 4000 in the air with a heating rate of 10 °C min<sup>-1</sup>. X-ray photoelectron spectroscopy (XPS) was conducted on a Thermo Scientific K-Alpha spectrometer equipped with a monochromatic Al K $\alpha$  X-ray source (1486.6 eV) operating at 100 W.

### Electrochemical Characterization

The working electrodes were fabricated by mixing  $Zn_{0.99}V_5O_{12} \cdot nH_2O$  with superconducting carbon black and polyvinylidene fluoride (PVDF) at a weight ratio of 7:2:1 in N-methyl-2-pyrrolidone (NMP). The obtained slurry was evenly coated on a 500 mesh stainless steel mesh and then vacuum dried at 60°C for 12 h. The active material in the electrode for the coin battery was 1.5-3 mg cm<sup>-2</sup>. The mass of active material in the soft packaging battery was around 0.9-1.6 mg cm<sup>-2</sup>. Using 3M  $Zn(CF_3SO_3)_2$  aqueous solution as the electrolyte, glass fiber as a separator, and metal zinc as a negative electrode, the coin/soft packaging batteries were assembled in the air. The soft packaging batteries were assembled using aluminum-plastic film as the outer packaging. The air was pumped out by the heat-collecting vacuum sealing machine. The electrochemical performance of these batteries was tested using the Neware battery testing system (CT4008T) at 0.2-1.6 V. The electrochemical impedance spectroscopy and cyclic voltammetry curves were tested by the Chenhua Electrochemical Workstation (CHI760E).

The galvanostatic intermittent titration technique (GITT) was employed to measure the  $Zn^{2+}$  diffusion coefficient ( $D_{Zn^{2+}}$ ) within a charge/discharge time of 10 mins and followed by a relaxation time of 30 mins at 0.1 A g<sup>-1</sup>. The assembled ZIBs were first discharged and charged in two cycles at 0.1 A g<sup>-1</sup> to reach a stable state. Then the GITT measurements were taken.  $D_{Zn^{2+}}$  was calculated according to the following formula:

$$D_{Zn^{2+}} = \frac{4}{\pi\tau} \left( \frac{m_B V_M}{M_B S} \right)^2 \left( \frac{\Delta E_s}{\Delta E_\tau} \right)^2$$

where  $m_B$ ,  $M_B$ , and  $V_M$  refer to the mass loading (g), molar mass (g mol<sup>-1</sup>), and molar volume (cm<sup>3</sup> mol<sup>-1</sup>) for ZnVO,  $\tau$  is current pulse time (s),  $\Delta E_\tau$  and  $\Delta E_s$  represent the voltage variation (V) during the constant current pulse of one single-step GITT test after removing the IR drop and the steady-state potential change (V) by the current pulse during one single-step GITT process, respectively.[1]

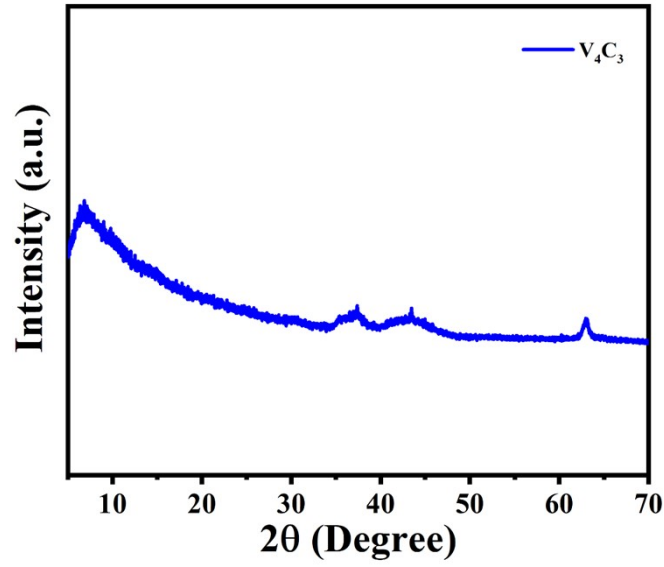

Fig. S1 XRD pattern of  $V_4C_3$ .

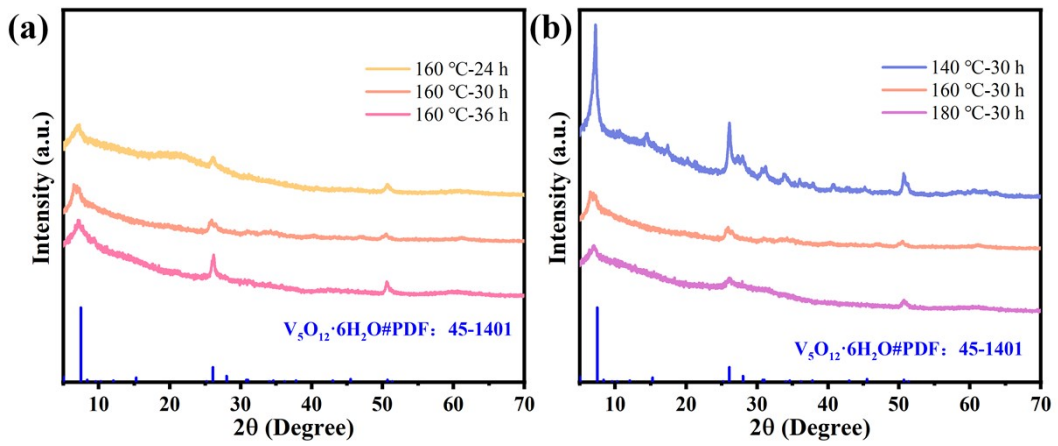

Fig. S2 XRD patterns of ZnVO synthesized at different a) times and b) temperatures.

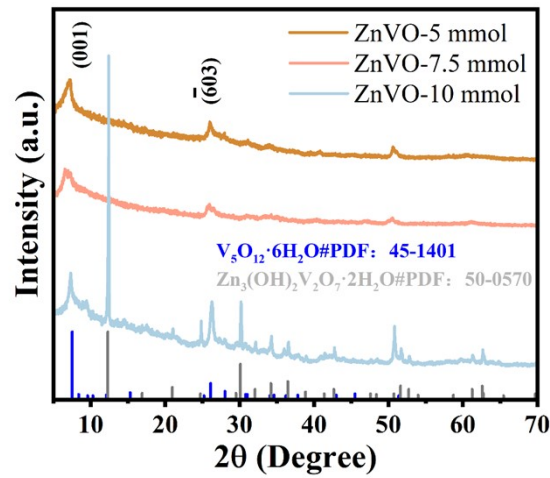

Fig. S3 XRD patterns of ZnVO synthesized at different  $Zn^{2+}$  concentration.

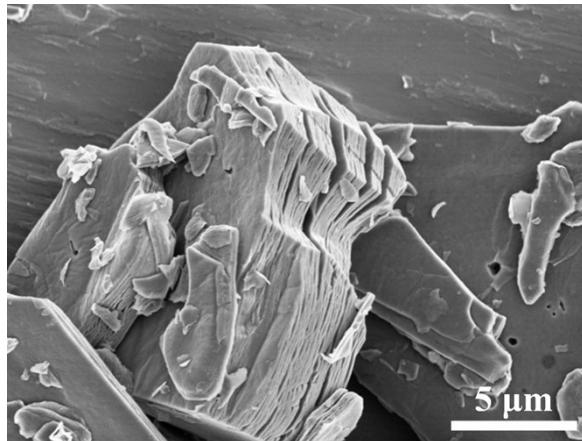

**Fig. S4** SEM image of V<sub>4</sub>C<sub>3</sub> raw material.

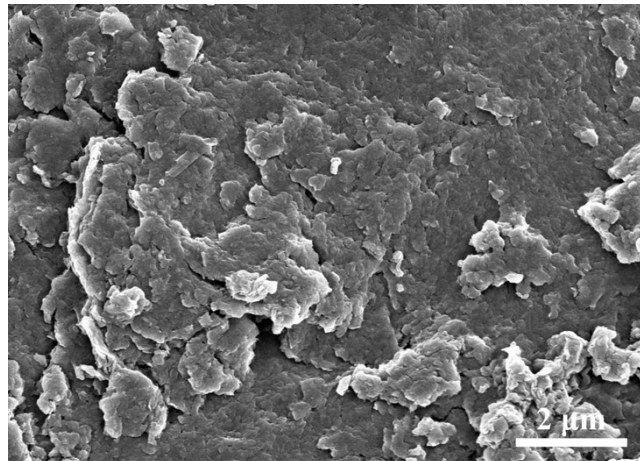

**Fig. S5** SEM image of CoVO.

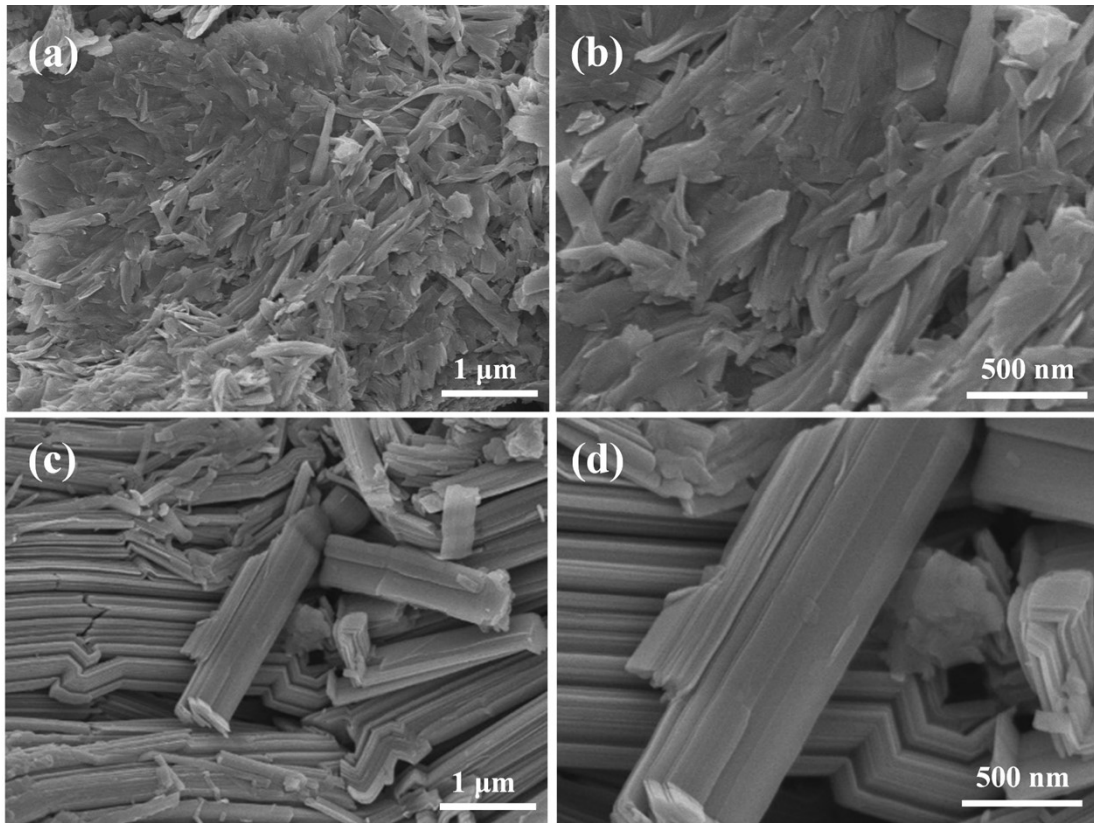

**Fig. S6** SEM images of (a, b) ZnVO-160 °C-24 h and (c, d) ZnVO-160 °C-36 h.

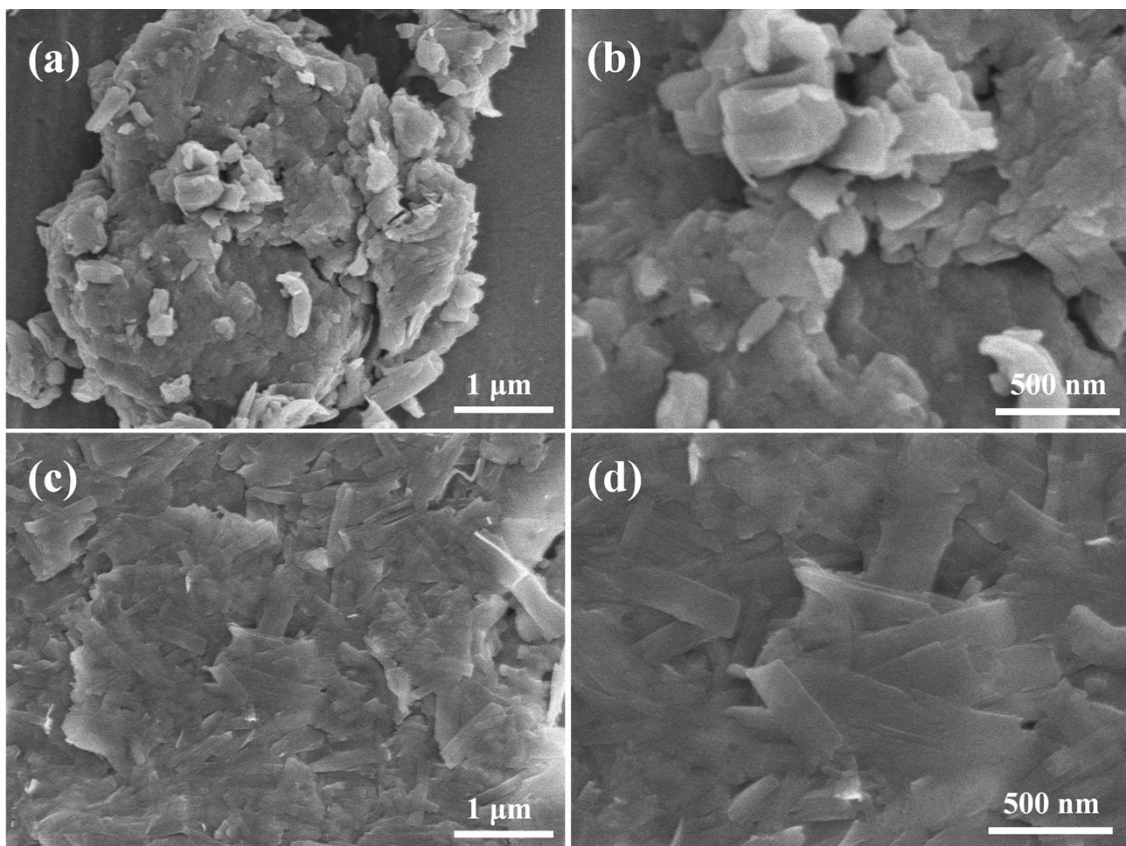

**Fig. S7** SEM images of (a, b) ZnVO-140 °C-30 h and (c, d) ZnVO-180 °C-30 h.

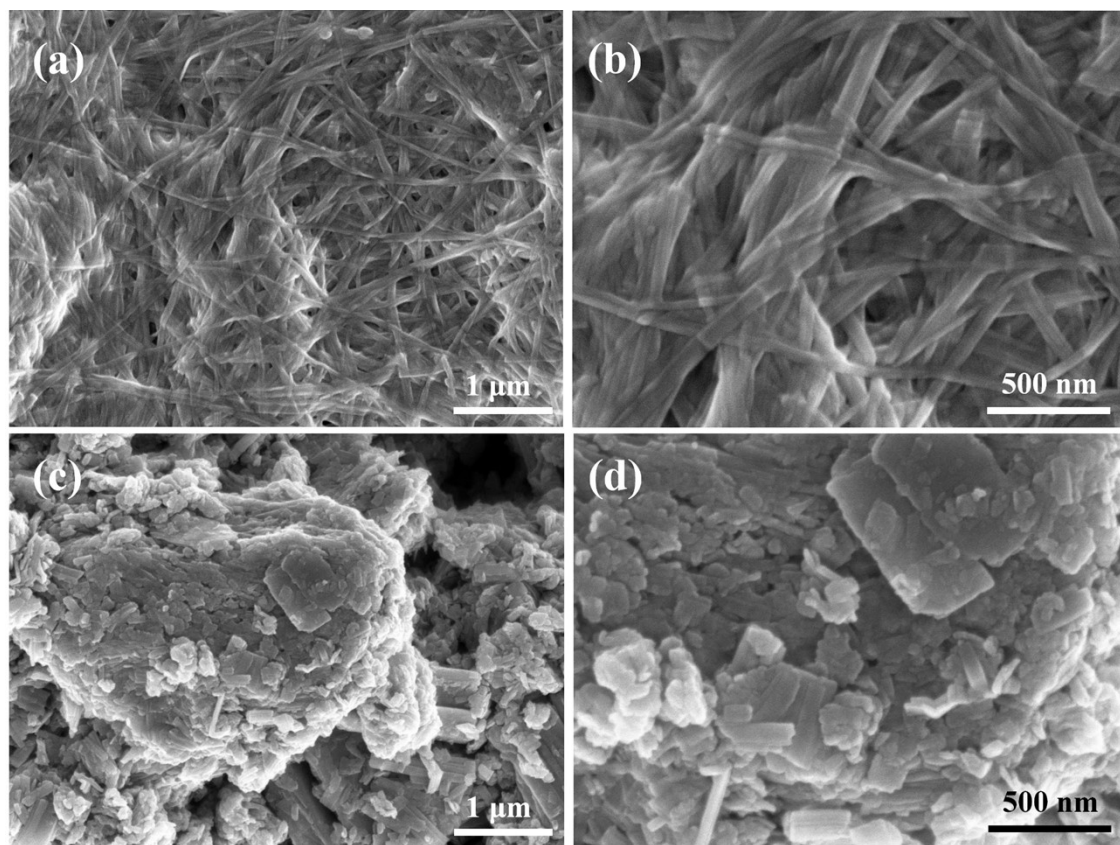

**Fig. S8** SEM images of (a, b) ZnVO-160 °C-30 h-5 mmol and (c, d) ZnVO-160 °C-30 h-10 mmol.

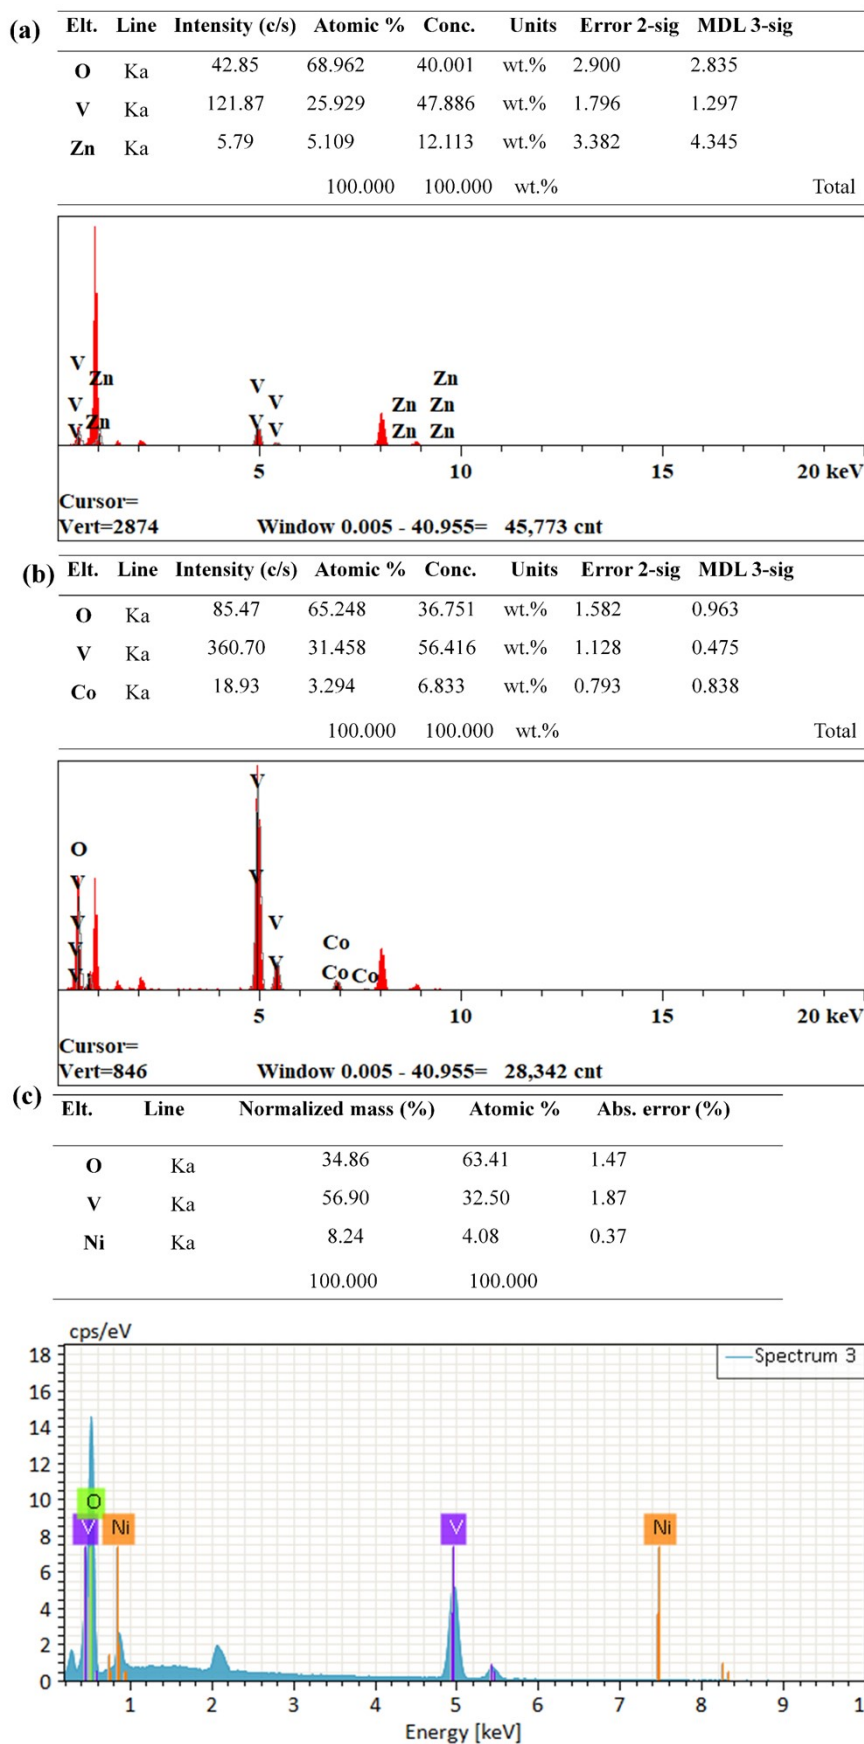

**Fig. S9** EDS reports of a) ZnVO, b) CoVO, and c) NiVO.

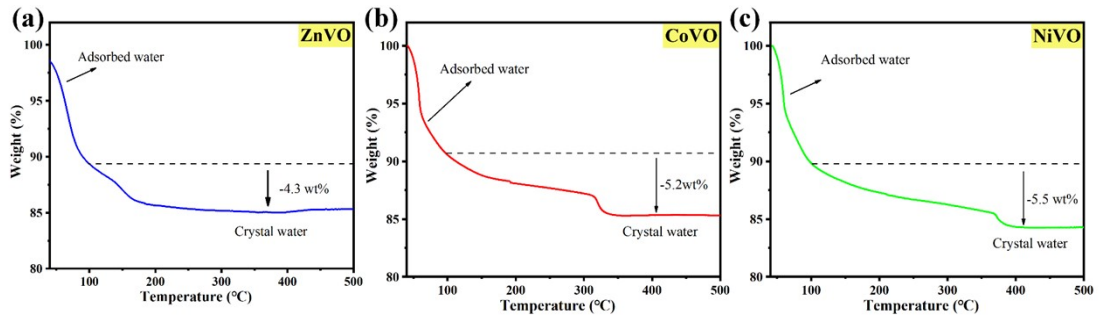

**Fig. S10** TGA curves of a)  $\text{Zn}_{0.99}\text{V}_5\text{O}_{12}\cdot n\text{H}_2\text{O}$ , b)  $\text{Co}_{0.60}\text{V}_5\text{O}_{12}\cdot n\text{H}_2\text{O}$ , and c)  $\text{Ni}_{0.58}\text{V}_5\text{O}_{12}\cdot n\text{H}_2\text{O}$ .

The formula for calculating the content of crystal water is as follows:

$$m_a = \frac{18n}{M}$$

where  $m_a$  is the weight loss rate of crystalline water,  $n$  is the number of crystalline water, and  $M$  is the molar mass of the material.

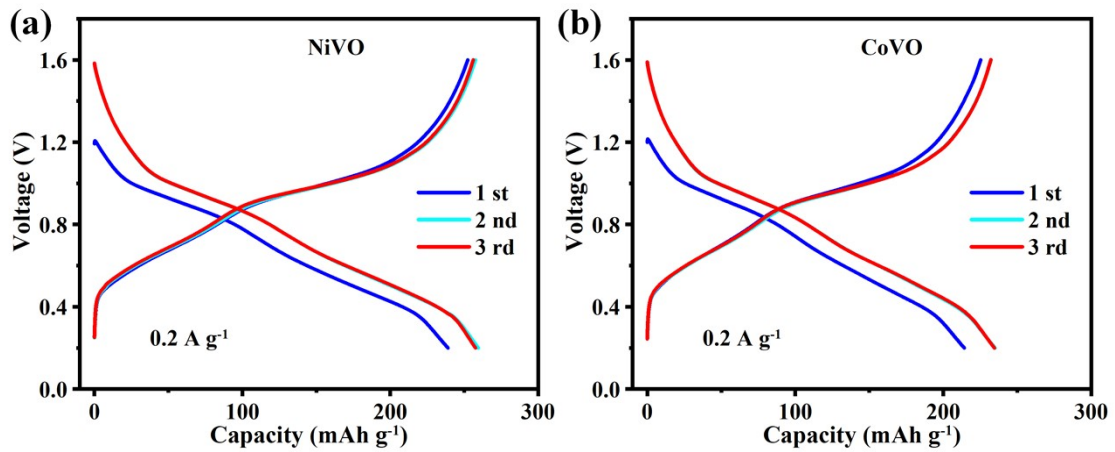

**Fig. S11** The initial three charge-discharge curves of a) NiVO and b) CoVO at  $0.2 \text{ A g}^{-1}$ .



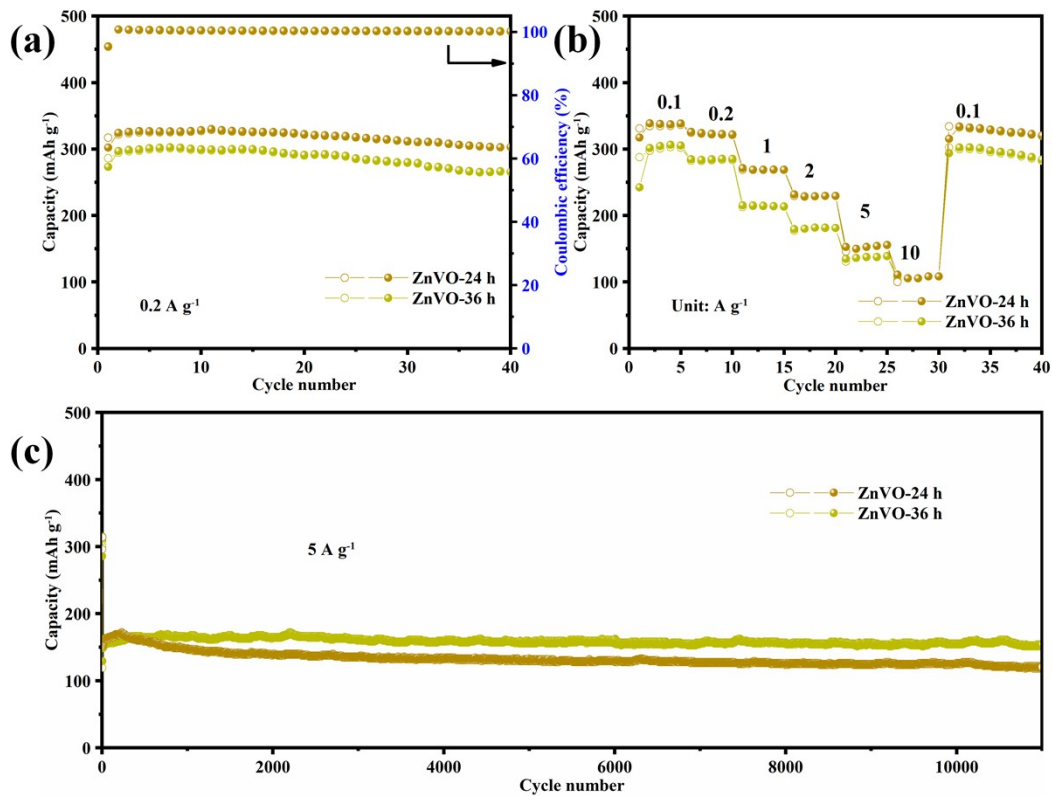

**Fig. S12** a) Cycling performance at 0.2 A g<sup>-1</sup>, b) rate performance, and c) long cycling performance at 5 A g<sup>-1</sup> of ZnVO prepared at 160 °C for different times.

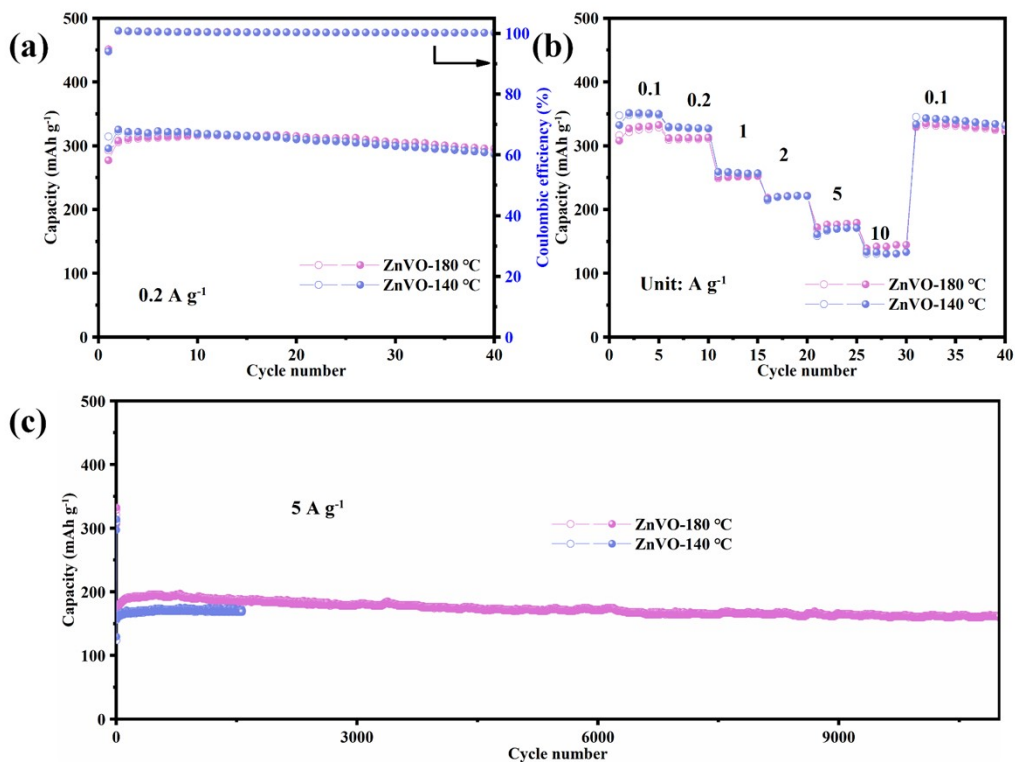

**Fig. S13** a) Cycling performance at 0.2 A g<sup>-1</sup>, b) rate performance, and c) long cycling performance at 5 A g<sup>-1</sup> of ZnVO prepared at different temperatures.

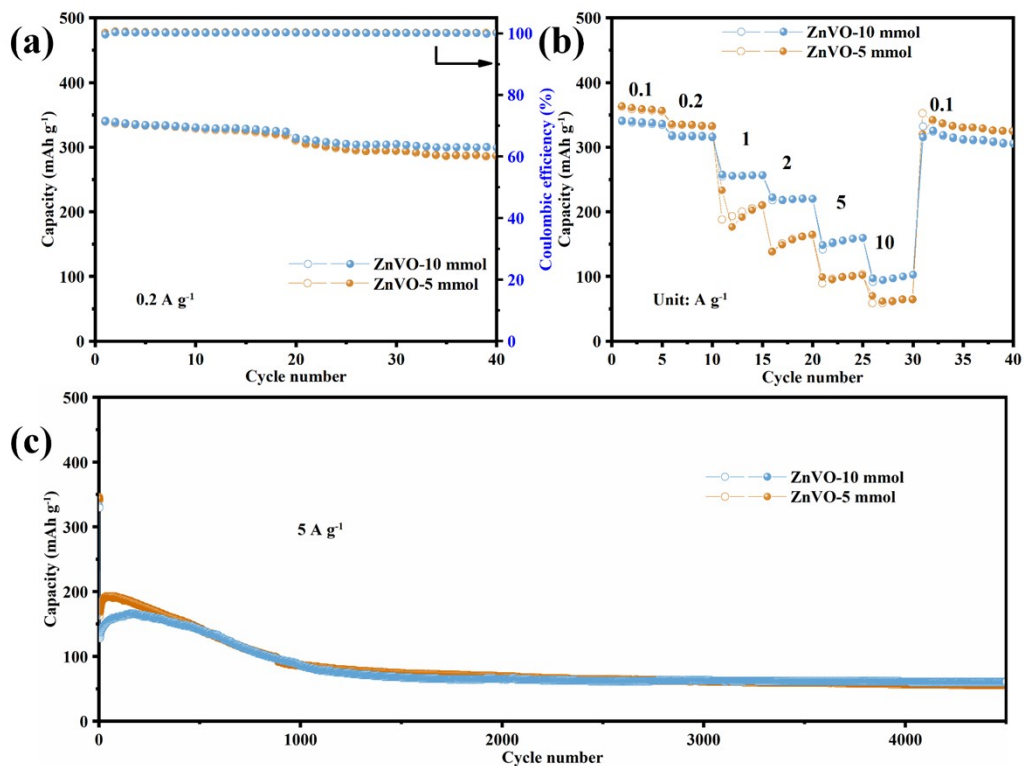

**Fig. S14** a) Cycling performance at 0.2 A g<sup>-1</sup>, b) rate performance, and c) long cycling performance at 5 A g<sup>-1</sup> of ZnVO prepared at different Zn<sup>2+</sup> concentration.

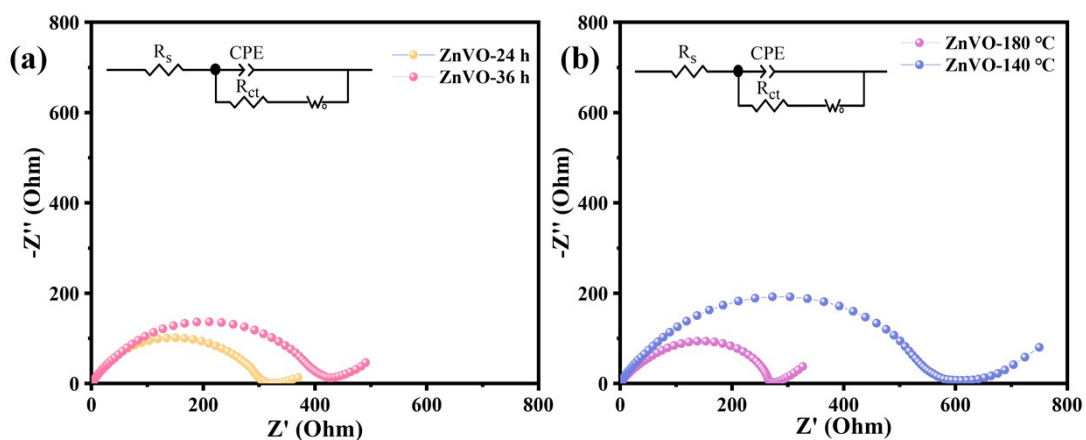

**Fig. S15** Nyquist plots of ZnVO electrodes synthesized at a) different times and b) different temperatures.

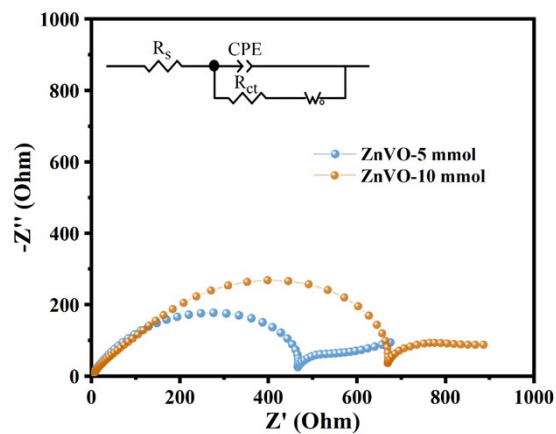

**Fig. S16** Nyquist plots of ZnVO electrodes synthesized at different  $Zn^{2+}$  concentration.

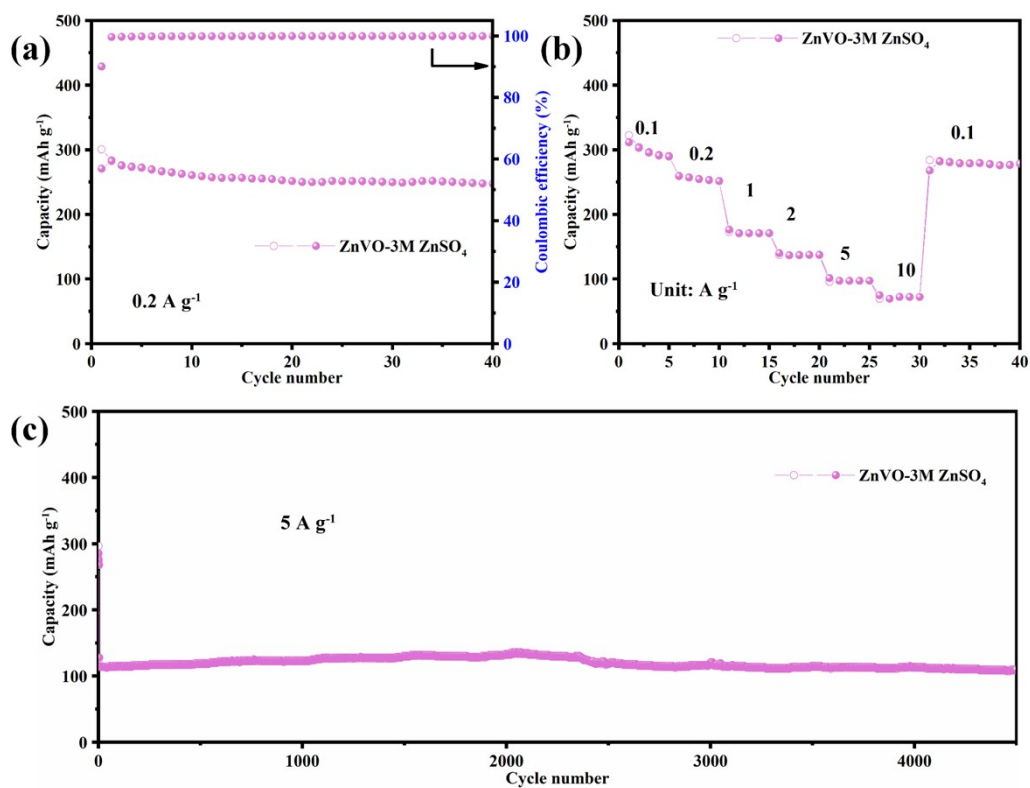

**Fig. S17** a) Cycling performance at  $0.2 \text{ A g}^{-1}$ , b) rate performance, and c) long cycling performance at  $5 \text{ A g}^{-1}$  of ZnVO- $160 \text{ }^\circ\text{C}$ -30 h in  $3\text{M ZnSO}_4$  electrolytes.

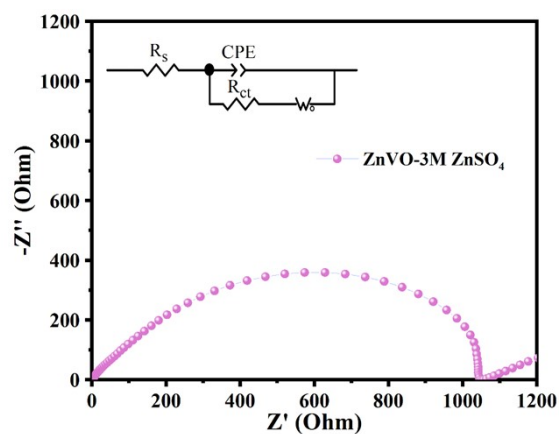

**Fig. S18** Nyquist plots of ZnVO-160 °C-30 h electrodes in 3M ZnSO<sub>4</sub> electrolytes.

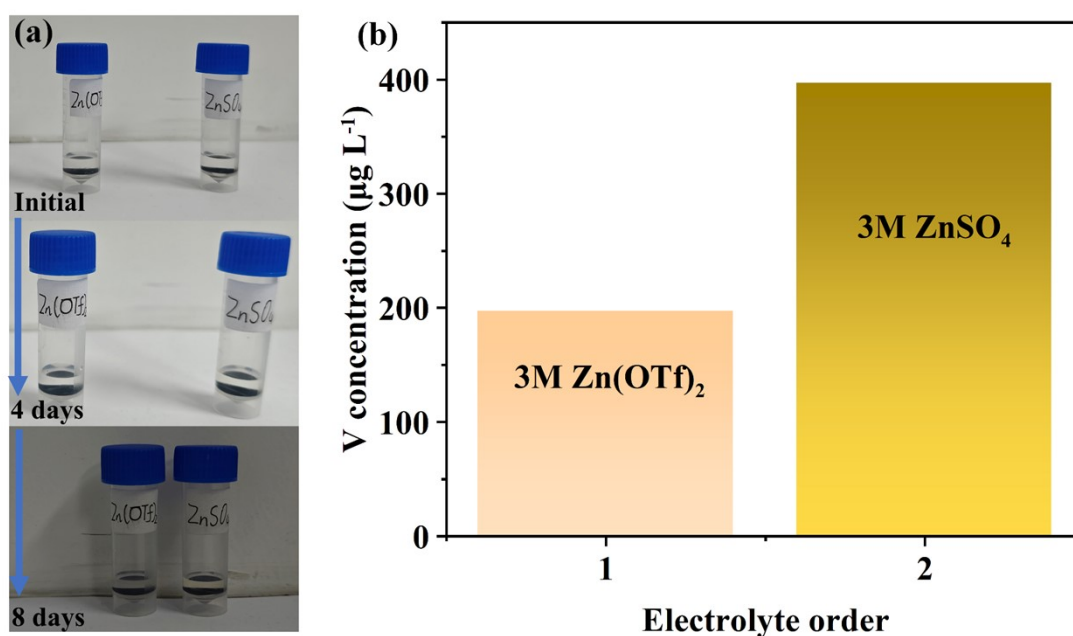

**Fig. S19** a) The state changes of ZnVO electrodes in different electrolytes and b) the concentration of element V in different electrolytes after 8 days.

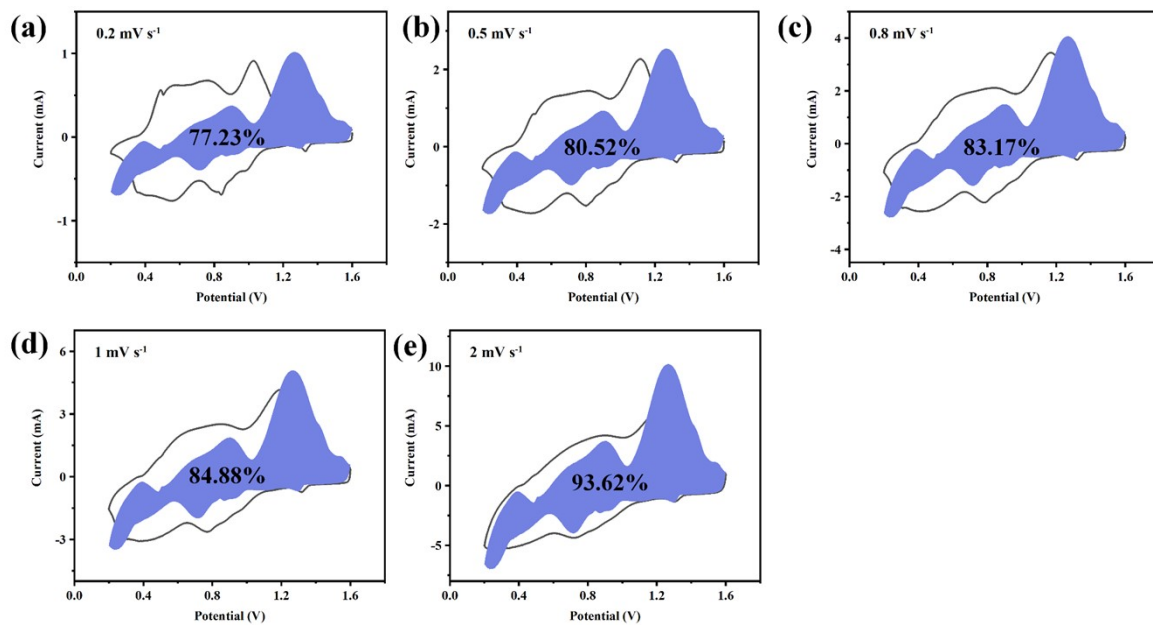

**Fig. S20** The capacitive controlled portion of ZnVO at different scan rates.

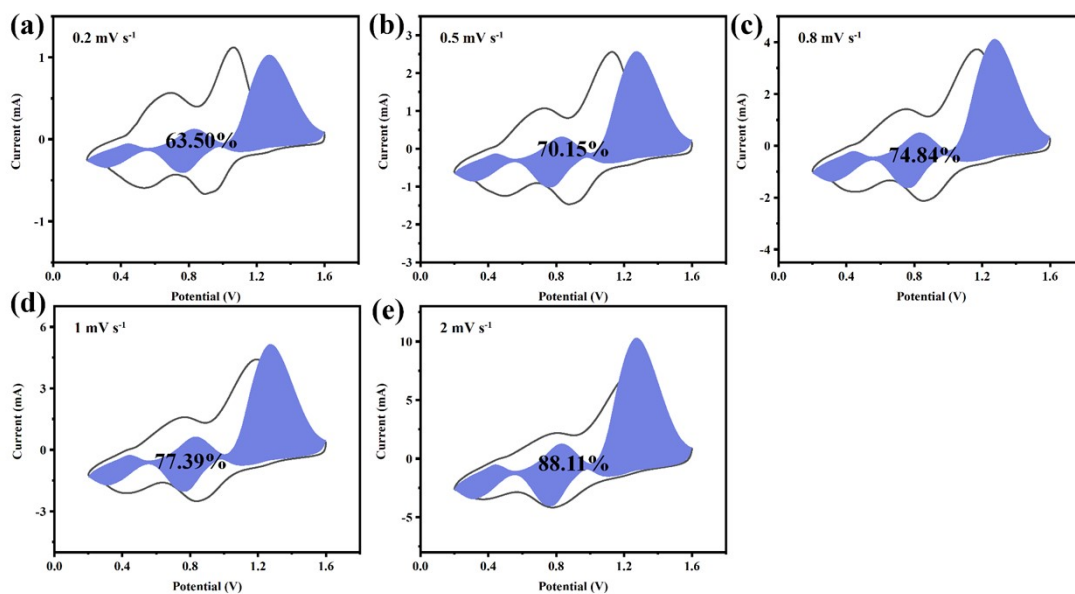

**Fig. S21** The capacitive controlled portion of NiVO at different scan rates.

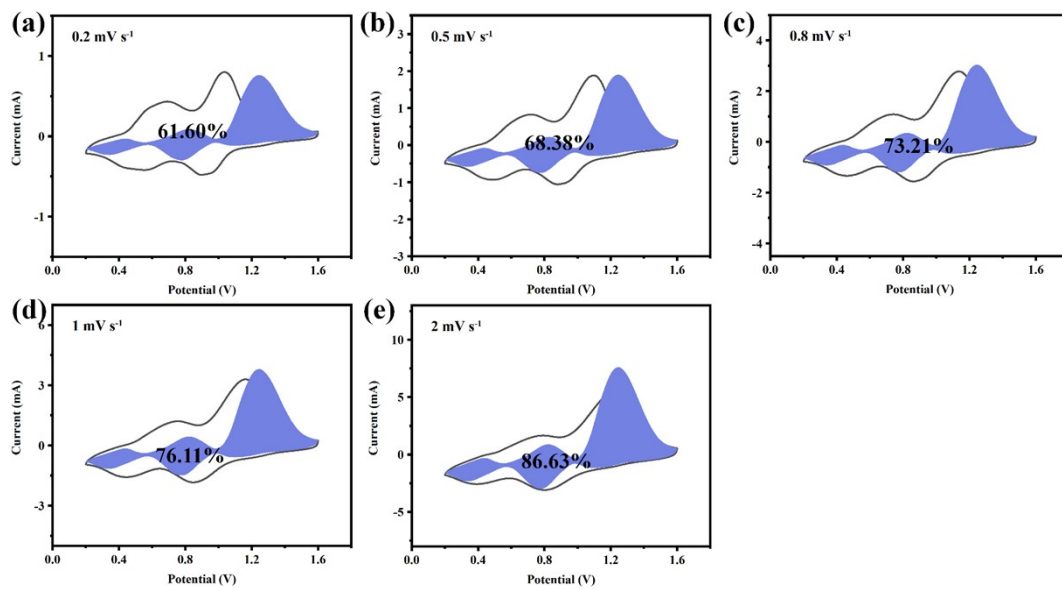

**Fig. S22** The capacitive controlled portion of CoVO at different scan rates.

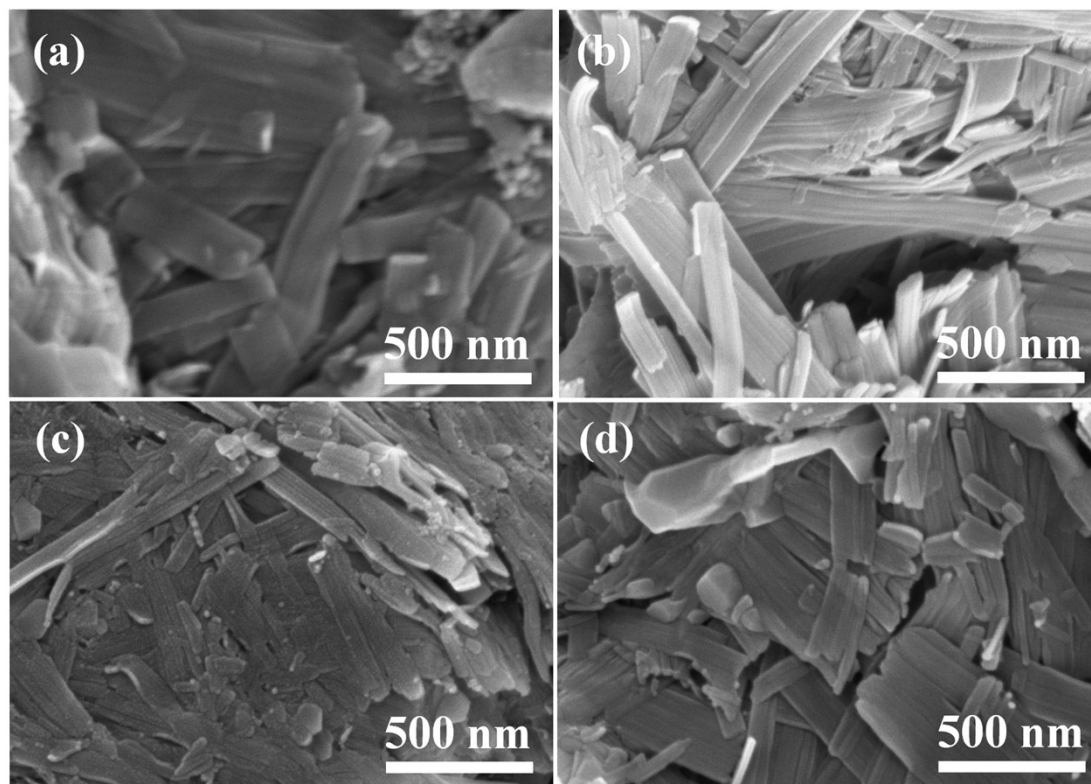

**Fig. S23** SEM images of ZnVO electrodes for (a) the pristine state, (b) the 10<sup>th</sup> cycle, (c) the 20<sup>th</sup> cycle, and (d) the 40<sup>th</sup> cycle.

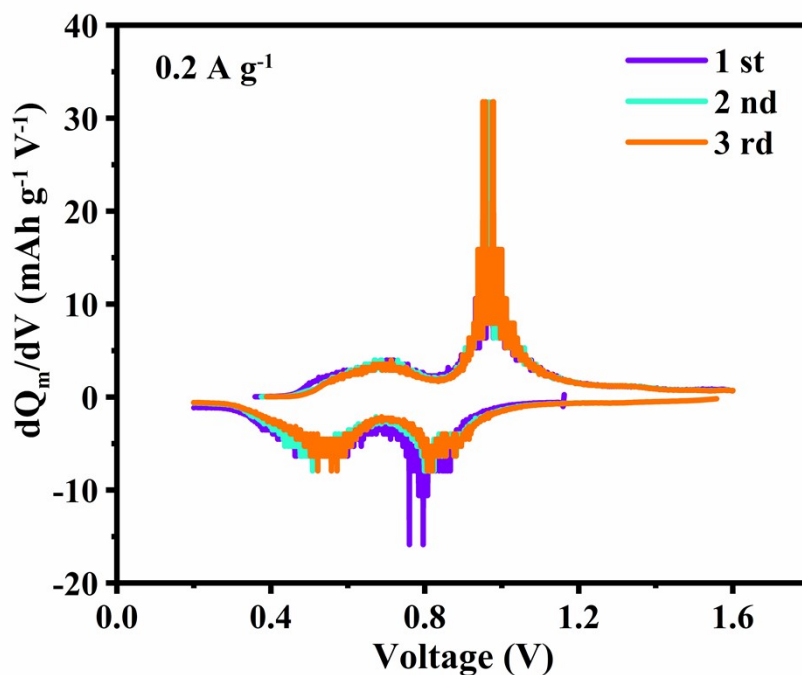

**Fig. S24** The corresponding  $dQ_m/dV$  curves of flexible packaging battery at  $0.2 \text{ A g}^{-1}$ .

**Table S1** Correlation between the size and charge of the pre-intercalated ion M (M = Zn, Co, Ni), and experimentally obtained structure (interlayer spacing) and composition (x in  $M_xV_5O_{12}$ ) of the  $M_xV_5O_{12}$  materials.

| M in $M_xV_5O_{12}$ | Ion radius (Å) | Hydrated ion radius (Å) | Interlayer spacing (Å) | x in $M_xV_5O_{12}$ (EDS) | x in $M_xV_5O_{12}$ (ICP-MS) |
|---------------------|----------------|-------------------------|------------------------|---------------------------|------------------------------|
| Zn <sup>2+</sup>    | 0.74           | 4.30                    | 13.465                 | 0.99                      | 0.99                         |
| Co <sup>2+</sup>    | 0.72           | 4.23                    | 13.327                 | 0.52                      | 0.60                         |
| Ni <sup>2+</sup>    | 0.70           | 4.04                    | 13.193                 | 0.63                      | 0.58                         |

**Table S2** Performance comparison between ZnVO and recently reported vanadium-based materials.

| Cathode                                                                     | Specific capacity                                  | Loss rate per cycle (cycles, current density) | Reference |
|-----------------------------------------------------------------------------|----------------------------------------------------|-----------------------------------------------|-----------|
| $\text{Zn}_{0.99}\text{V}_5\text{O}_{12} \cdot 1.28\text{H}_2\text{O}$      | 416 mAh g <sup>-1</sup> (0.1 A g <sup>-1</sup> )   | 0.000687% (15000, 5 A g <sup>-1</sup> )       | This work |
| $\text{Ca}_{0.22}\text{V}_2\text{O}_5 \cdot n\text{H}_2\text{O}/\text{rGO}$ | 409 mAh g <sup>-1</sup> (0.05 A g <sup>-1</sup> )  | 0.005% (2000, 4 A g <sup>-1</sup> )           | [2]       |
| $\text{Mg}_{0.23}\text{V}_2\text{O}_5 \cdot 1.0\text{H}_2\text{O}$          | 393 mAh g <sup>-1</sup> (0.2 A g <sup>-1</sup> )   | 0.0007% (2000, 5 A g <sup>-1</sup> )          | [3]       |
| $\text{Cu}_x\text{V}_2\text{O}_5 \cdot n\text{H}_2\text{O}$                 | 379 mAh g <sup>-1</sup> (0.5 A g <sup>-1</sup> )   | 0.007% (1000, 4 A g <sup>-1</sup> )           | [4]       |
| $(\text{NH}_4)_x\text{V}_2\text{O}_5 \cdot n\text{H}_2\text{O}$             | 372 mAh g <sup>-1</sup> (0.1 A g <sup>-1</sup> )   | 0.01% (2000, 5 A g <sup>-1</sup> )            | [5]       |
| $\text{Ca}_{0.23}\text{V}_2\text{O}_5 \cdot 0.95\text{H}_2\text{O}$         | 355.2 mAh g <sup>-1</sup> (0.2 A g <sup>-1</sup> ) | 0.00115% (2000, 5 A g <sup>-1</sup> )         | [6]       |
| $\text{Mg}_{0.34}\text{V}_2\text{O}_5 \cdot 0.84\text{H}_2\text{O}$         | 353 mAh g <sup>-1</sup> (0.1 A g <sup>-1</sup> )   | 0.0015% (2000, 5 A g <sup>-1</sup> )          | [7]       |
| $\text{Na}_2\text{V}_6\text{O}_{16} \cdot 1.63\text{H}_2\text{O}$           | 352 mAh g <sup>-1</sup> (0.05 A g <sup>-1</sup> )  | 0.00166 % (6000, 5 A g <sup>-1</sup> )        | [8]       |
| $(\text{NH}_4)_2\text{V}_6\text{O}_{16}$                                    | 323.5 mAh g <sup>-1</sup> (0.1 A g <sup>-1</sup> ) | 0.01085% (2000, 0.1 A g <sup>-1</sup> )       | [9]       |
| $\text{Zn}_x\text{V}_2\text{O}_5 \cdot n\text{H}_2\text{O}$                 | 304 mAh g <sup>-1</sup> (0.5 A g <sup>-1</sup> )   | 0.02% (2000, 20 A g <sup>-1</sup> )           | [10]      |
| $\text{Zn}_{0.25}\text{V}_2\text{O}_5 \cdot 0.85\text{H}_2\text{O}$         | 300 mAh g <sup>-1</sup> (0.05 A g <sup>-1</sup> )  | 0.019% (1000, 2.4 A g <sup>-1</sup> )         | [11]      |
| $\text{Ag}_2\text{V}_4\text{O}_{11}$                                        | 200 mAh g <sup>-1</sup> (0.3 A g <sup>-1</sup> )   | 0.4% (100, 1 A g <sup>-1</sup> )              | [12]      |
| $(\text{NH}_4)_2\text{V}_{10}\text{O}_{25} \cdot 8\text{H}_2\text{O}$       | 228.8 mAh g <sup>-1</sup> (0.1 A g <sup>-1</sup> ) | 0.00198% (5000, 10 A g <sup>-1</sup> )        | [13]      |



**Table S3** Kinetics comparison between ZnVO and other reported ZVO-H<sub>2</sub>O materials.

| Cathode                                                                            | Interlayer spacing of (001) plane (Å) | R <sub>ct</sub> (Ω) | Capacitive contribution ratio                                    | D <sub>Zn<sup>2+</sup></sub> value (cm <sup>2</sup> s <sup>-1</sup> ) | Reference |
|------------------------------------------------------------------------------------|---------------------------------------|---------------------|------------------------------------------------------------------|-----------------------------------------------------------------------|-----------|
| Zn <sub>0.99</sub> V <sub>5</sub> O <sub>12</sub> ·1.28H <sub>2</sub> O            | 13.465                                | 222                 | 77.2% (0.2 mV s <sup>-1</sup> )<br>84.9% (1 mV s <sup>-1</sup> ) | 1.3~2.1×10 <sup>-9</sup> ~2.1~10 <sup>-10</sup>                       | This work |
| Zn <sub>x</sub> V <sub>2</sub> O <sub>5</sub> ·nH <sub>2</sub> O                   | 12.81                                 | 350                 | /                                                                | /                                                                     | [10]      |
| Zn <sub>0.25</sub> V <sub>2</sub> O <sub>5</sub> ·0.85H <sub>2</sub> O             | /                                     | /                   | /                                                                | 10 <sup>-9</sup> ~10 <sup>-10</sup>                                   | [11]      |
| Zn <sub>3</sub> V <sub>2</sub> O <sub>7</sub> (OH) <sub>2</sub> ·2H <sub>2</sub> O | 12.58                                 | /                   | 62% (0.3 mV s <sup>-1</sup> )                                    | 10 <sup>-9</sup> ~10 <sup>-10</sup>                                   | [14]      |
| Zn <sub>2</sub> V <sub>2</sub> O <sub>7</sub>                                      | /                                     | /                   | 56% (1 mV s <sup>-1</sup> )                                      | /                                                                     | [15]      |
| Zn <sub>3</sub> V <sub>2</sub> O <sub>7</sub> (OH) <sub>2</sub> ·2H <sub>2</sub> O | 7.2                                   | 2800                | 51% (0.2 mV s <sup>-1</sup> )                                    | 10 <sup>-10</sup> ~10 <sup>-11</sup>                                  | [16]      |
| ZnV <sub>2</sub> O <sub>4</sub>                                                    | /                                     | 450                 | 50.8% (1 mV s <sup>-1</sup> )                                    | 7~10 <sup>-10</sup>                                                   | [17]      |
| Zn <sub>3</sub> V <sub>2</sub> O <sub>8</sub> ·1.85H <sub>2</sub> O                | 7.67                                  | /                   | /                                                                | /                                                                     | [18]      |
| Zn <sub>0.31</sub> V <sub>2</sub> O <sub>5</sub>                                   | 10.3                                  | 950                 | 68.8% (1 mV s <sup>-1</sup> )                                    | /                                                                     | [19]      |
| Zn <sub>0.64</sub> V <sub>6</sub> O <sub>13</sub> ·1.62H <sub>2</sub> O            | 12.5                                  | /                   | /                                                                | /                                                                     | [20]      |

**Table S4** Kinetics comparison between ZnVO and other reported unmodified vanadium oxide materials.

| Cathode                                                                 | Interlayer spacing of (001) plane (Å) | R <sub>ct</sub> (Ω) | Capacitive contribution ratio   | D <sub>Zn<sup>2+</sup></sub> value (cm <sup>2</sup> s <sup>-1</sup> ) | Reference |
|-------------------------------------------------------------------------|---------------------------------------|---------------------|---------------------------------|-----------------------------------------------------------------------|-----------|
| Zn <sub>0.99</sub> V <sub>5</sub> O <sub>12</sub> ·1.28H <sub>2</sub> O | 13.465                                | 222                 | 84.88% (1 mV s <sup>-1</sup> )  | 1.3~2.1×10 <sup>-9</sup> ~2.1~10 <sup>-10</sup>                       | This work |
| V <sub>5</sub> O <sub>12</sub> ·6H <sub>2</sub> O                       | 11.8                                  | 150                 | 50.5% (0.4 mV s <sup>-1</sup> ) | 10 <sup>-10</sup> ~10 <sup>-11</sup>                                  | [21]      |
| V <sub>5</sub> O <sub>12</sub> ·2.7H <sub>2</sub> O                     | 13                                    | 60.9                | 95% (1 mV s <sup>-1</sup> )     | 10 <sup>-10</sup> ~10 <sup>-15</sup>                                  | [22]      |
| V <sub>5</sub> O <sub>12</sub> ·6H <sub>2</sub> O                       | 11.8                                  | /                   | 20.5% (1 mV s <sup>-1</sup> )   | /                                                                     | [23]      |
| V <sub>5</sub> O <sub>12</sub> ·6H <sub>2</sub> O                       | 13.4                                  | 671                 | 85% (1 mV s <sup>-1</sup> )     | 10 <sup>-9</sup> ~10 <sup>-11</sup>                                   | [24]      |
| V <sub>5</sub> O <sub>12</sub> ·6H <sub>2</sub> O                       | 12.3                                  | 30                  | 83.3% (1 mV s <sup>-1</sup> )   | 10 <sup>-11</sup> ~10 <sup>-13</sup>                                  | [25]      |

## References

- 1 Z. Yao, Q. Wu, K. Chen, J. Liu and C. Li, *Energy Environ. Sci.*, 2020, **13**, 3149–3163.
- 2 T. Hu, Z. Feng, Y. Zhang, Y. Liu, J. Sun, J. Zheng, H. Jiang, P. Wang, X. Dong and C. Meng, *Inorg. Chem. Fron.*, 2021, **8**, 79–89.
- 3 W. Xu, C. Liu, Q. Wu, W. Xie, W.-Y. Kim, S.-Y. Lee and J. Gwon, *J. Mater. Chem. A*, 2020, **8**, 18327–18337.
- 4 C. Liu, M. Tian, M. Wang, J. Zheng, S. Wang, M. Yan, Z. Wang, Z. Yin, J. Yang and G. Cao, *J. Mater. Chem. A*, 2020, **8**, 7713–7723.
- 5 L. Xu, Y. Zhang, J. Zheng, H. Jiang, T. Hu and C. Meng, *Mater. Today Energy*, 2020, **18**, 100509.
- 6 W. Zhou, M. Chen, A. Wang, A. Huang, J. Chen, X. Xu and C.-P. Wong, *J. Energy Chem.*, 2021, **52**, 377–384.
- 7 F. Ming, H. Liang, Y. Lei, S. Kandambeth, M. Eddaoudi and H. N. Alshareef, *ACS Energy Lett.*, 2018, **3**, 2602–2609.
- 8 P. Hu, T. Zhu, X. Wang, X. Wei, M. Yan, J. Li, W. Luo, W. Yang, W. Zhang, L. Zhou, Z. Zhou and L. Mai, *Nano Lett.*, 2018, **18**, 1758–1763.
- 9 L. Xu, Y. Zhang, H. Jiang, J. Zheng, X. Dong, T. Hu and C. Meng, *Colloids Surf. A Physicochem. Eng. Asp.*, 2020, **593**, 124621.
- 10 Y. Yang, Y. Tang, S. Liang, Z. Wu, G. Fang, X. Cao, C. Wang, T. Lin, A. Pan and J. Zhou, *Nano Energy*, 2019, **61**, 617–625.
- 11 D. Kundu, B. D. Adams, V. Duffort, S. H. Vajargah and L. F. Nazar, *Nat. Energy*, 2016, **1**, 16119.
- 12 S. Guo, G. Fang, S. Liang, M. Chen, X. Wu and J. Zhou, *Acta Mater.*, 2019, **180**, 51–59.
- 13 T. Wei, Q. Li, G. Yang and C. Wang, *J. Mater. Chem. A*, 2018, **6**, 20402–20410.
- 14 C. Xia, J. Guo, Y. Lei, H. Liang, C. Zhao and H. N. Alshareef, *Adv. Mater.*, 2018, **30**, 1705580.
- 15 B. Sambandam, V. Soundharrajan, S. Kim, M. H. Alfaruqi, J. Jo, S. Kim, V. Mathew, Y. Sun and J. Kim, *J. Mater. Chem. A*, 2018, **6**, 3850–3856.
- 16 H. Cao, C. Peng, Z. Zheng, Z. Lan, Q. Pan, U. G. Nielsen, P. Norby, X. Xiao and S. Mossin, *Electrochim. Acta*, 2021, **388**, 138646.
- 17 Y. Liu, C. Li, J. Xu, M. Ou, C. Fang, S. Sun, Y. Qiu, J. Peng, G. Lu, Q. Li, J. Han and Y. Huang, *Nano Energy*, 2020, **67**, 104211.
- 18 Z. Xie, J. Lai, X. Zhu and Y. Wang, *ACS Appl. Energy Mater.*, 2018, **1**, 6401–6408.
- 19 Z. Pang, B. Ding, J. Wang, Y. Wang, L. Xu, L. Zhou, X. Jiang, X. Yan, J. P. Hill, L. Yu and Y. Yamauchi, *Chem. Eng. J.*, 2022, **446**, 136861.
- 20 T. Lv, G. Zhu, S. Dong, Q. Kong, Y. Peng, S. Jiang, G. Zhang, Z. Yang, S. Yang, X. Dong, H. Pang and Y. Zhang, *Angew. Chem. Int. Ed.*, 2023, **135**, e202216089.
- 21 N. Zhang, M. Jia, Y. Dong, Y. Wang, J. Xu, Y. Liu, L. Jiao and F. Cheng, *Adv. Funct. Mater.*, 2019, **29**, 1807331.
- 22 C.-E. M. Lewis, J. F. S. Fernando, D. P. Siriwardena, K. L. Firestein, C. Zhang and D. V. Golberg, *ACS Appl. Energy Mater.*, 2022, **5**, 4159–4169.

- 23P. Yadav, N. Sanna Kotrappanavar, P. B. Naik, H. K. Beere, K. Samanta, N. S. Reddy, J. S. Algethami, M. Jalalah, F. A. Harraz and D. Ghosh, *ACS Appl. Energy Mater.*, 2023, **6**, 1799–1809.
- 24T. Wei, Q. Li, G. Yang and C. Wang, *Adv. Energy Mater.*, 2019, **9**, 1901480.
- 25B. Xiao, J. Chen, C. Hu, L. Mou, W. Yang, W. He, Z. Lu, S. Peng and J. Huang, *Adv. Funct. Mater.*, 2023, **33**, 2211679.
